# Supplementary material
Source: PubMed Central journal article supplement (PMC6391605)
Supplement: awy352_supplementary_material.pdf [file awy352_supplementary_material.pdf]

## Supplementary material

**Table A1.** Summary of MRI system, acquisition parameters and vertebral coverage across participating sites.

| Site                                                                    | MRI scanner      | Contrast, Orientation      | Vertebral coverage (median, range) | TR (ms) | TE (ms) | FOV(mm <sup>2</sup> ) | Number of slices, slice thickness (mm) |
|-------------------------------------------------------------------------|------------------|----------------------------|------------------------------------|---------|---------|-----------------------|----------------------------------------|
| Aix-Marseille University, Hôpital La Timone, Marseille, France (n = 15) | 3T               | T <sub>2</sub> *w, Axial   | C1-C7                              | 849     | 23      | 179x179               | 40, 3.00                               |
|                                                                         |                  | T <sub>2</sub> w, Sagittal | C1-C7                              | 3000    | 68      | 261x261               | 15, 2.50                               |
| Brigham and Women's Hospital, Boston, USA (n = 80)                      | 3T               | T <sub>2</sub> w, Axial    | C1-C7                              | 5070    | 101     | 179x179               | 47, 3.00                               |
| Karolinska University Hospital, Stockholm, Sweden (n = 51)              | Siemens Trio 3T  | T <sub>2</sub> *w, Axial   | C1-C7                              | 561     | 17      | 179x179               | 30, 4.40                               |
| Massachusetts General Hospital, Boston, USA (n = 18)                    | 7T               | T <sub>2</sub> *w, Axial   | C1-C7                              | 500     | 7.8     | 219x210               | 36, 3.00                               |
| National Institutes of Health Clinical Center, Maryland, USA (n = 29)   | Siemens Skyra 3T | T <sub>2</sub> *w, Axial   | C1-C7                              | 560     | 17      | 260x195               | 28, 5.00                               |
|                                                                         |                  | T <sub>2</sub> w, Sagittal | C1-C7                              | 6000    | 27      | 384x384               | 30, 1.00                               |
| New York University Langone Medical Center, New York, USA (n = 151)     | Siemens 3T       | T <sub>2</sub> w, Axial    | C1-C7                              | 4000    | 107     | 200x156               | 60, 4.86                               |
|                                                                         |                  | T <sub>2</sub> w, Sagittal | C1-C7                              | 3000    | 103     | 180x135               | 32, 3.90                               |

|                                                                                                |                    |                            |       |      |     |         |          |
|------------------------------------------------------------------------------------------------|--------------------|----------------------------|-------|------|-----|---------|----------|
| French Observatory of Multiple Sclerosis, France (n = 32)                                      | 3T                 | T <sub>2</sub> *w, Axial   | C1-C3 | 992  | 29  | 198x179 | 16, 4.55 |
|                                                                                                |                    | T <sub>2</sub> w, Sagittal | C1-C7 | 4720 | 74  | 338x338 | 12, 4.80 |
| San Raffaele Scientific Institute, Vita-Salute San Raffaele University, Milan, Italy (n = 115) | Philips 3T Achieva | T <sub>2</sub> *w, Axial   | C1-C7 | 47   | 6.5 | 150x150 | 40, 2.50 |
|                                                                                                |                    | T <sub>2</sub> w, Sagittal | C1-C7 | 2933 | 70  | 250x250 | 14, 2.50 |
| University Hospital of Montpellier, France (n = 15)                                            | Siemens Skyra 3T   | T <sub>2</sub> *w, Axial   | C1-C7 | 849  | 23  | 179x179 | 40, 3.30 |
|                                                                                                |                    | T <sub>2</sub> w, Sagittal | C1-C7 | 3000 | 68  | 261x261 | 15, 2.75 |
| University Hospital of Rennes, Rennes, France (n = 51)                                         | Siemens Verio 3T   | T <sub>2</sub> *w, Axial   | C1-C7 | 849  | 23  | 179x179 | 40, 3.30 |
|                                                                                                |                    | T <sub>2</sub> w, Sagittal | C1-C7 | 3000 | 68  | 261x261 | 15, 2.75 |
| University College London, London, UK (n = 39)                                                 | 3T                 | T <sub>2</sub> *w, Axial   | C1-C3 | 23   | 5   | 240x240 | 10, 5.00 |
|                                                                                                |                    | T <sub>2</sub> w, Sagittal | C1-C7 | 4000 | 80  | 256x256 | 12, 3.00 |
| Zuckerberg San Francisco General Hospital, San Francisco, USA (n = 25)                         | 3T                 | T <sub>2</sub> *w, Axial   | C1-C7 | 3516 | 72  | 179x179 | 36, 3.30 |
| Vanderbilt University Medical Center, Nashville, USA (n = 23)                                  | Philips Achieva 3T | T <sub>2</sub> *w, Axial   | C2-C5 | 753  | 7   | 162x162 | 14, 5.00 |
|                                                                                                |                    | T <sub>2</sub> w, Sagittal | C1-C7 | 2500 | 100 | 251x251 | 18, 2.00 |

**Table A2.** Lesion frequency for different populations, defined by patient phenotype.

|              | Phenotype                |                          |                          |                          | Total cohort             |
|--------------|--------------------------|--------------------------|--------------------------|--------------------------|--------------------------|
|              | CIS                      | RRMS                     | SPMS                     | PPMS                     | n=642                    |
|              | n=31                     | n=416                    | n=84                     | n=73                     |                          |
| <b>C1-C3</b> | <b>1.37 (1.35, 1.4)</b>  | <b>2.74 (2.71, 2.77)</b> | <b>3.02 (2.98, 3.05)</b> | <b>3.49 (3.46, 3.53)</b> | <b>2.75 (2.73, 2.78)</b> |
| <b>C4-C7</b> | 1.23 (1.21, 1.25)        | 1.93 (1.91, 1.94)        | 1.96 (1.95, 1.98)        | 1.91 (1.89, 1.93)        | <b>1.89 (1.88, 1.91)</b> |
| <b>DC</b>    | <b>1.41 (1.38, 1.44)</b> | <b>2.48 (2.45, 2.51)</b> | <b>2.48 (2.45, 2.52)</b> | <b>2.60 (2.56, 2.65)</b> | <b>2.42 (2.39, 2.46)</b> |
| <b>LF</b>    | 1.06 (1.04, 1.08)        | 1.53 (1.52, 1.55)        | 1.73 (1.71, 1.75)        | 1.91 (1.88, 1.93)        | <b>1.57 (1.55, 1.59)</b> |
| <b>VF</b>    | 0.15 (0.15, 0.16)        | 0.40 (0.39, 0.41)        | 0.37 (0.37, 0.38)        | 0.33 (0.32, 0.34)        | <b>0.37 (0.36, 0.38)</b> |

Lesion frequency (%) averaged value (confidence interval at 95%) in multiple regions of interest of the cervical spinal cord, for different populations. For a given population (i.e. each column), values in violet indicate higher median values comparing (i) C1-C3 vs. C4-C7, (ii) DC vs. LF vs. VF. No statistical tests were performed for lesion frequency between regions of interests. Abbreviations: MS, multiple sclerosis; CIS, clinically isolated syndrome; RRMS, relapsing-remitting MS; PPMS, primary progressive MS; SPMS, secondary progressive MS; DC, dorsal columns; LF, lateral funiculi; VF, ventral funiculi. Phenotype was not available for all subjects.

**Table A3.** Lesion frequency for different populations, defined by patient EDSS and disease duration.

|              | Mild EDSS                 |                          |                          | Moderate EDSS            |                           |                          | Severe EDSS              |                          |                          | Total Cohort<br>(n=642)  |
|--------------|---------------------------|--------------------------|--------------------------|--------------------------|---------------------------|--------------------------|--------------------------|--------------------------|--------------------------|--------------------------|
|              | Short DD<br>(n=132)       | Moderate DD<br>(n=62)    | Long DD<br>(n=25)        | Short DD<br>(n=64)       | Moderate DD<br>(n=84)     | Long DD<br>(n=70)        | Short DD<br>(n=5)        | Moderate DD<br>(n=30)    | Long DD<br>(n=77)        |                          |
| <b>C1-C3</b> | <b>2.43 (2.40, 2.46)</b>  | <b>1.54 (1.52, 1.55)</b> | <b>2.44 (2.40, 2.48)</b> | <b>3.28 (3.24, 3.32)</b> | <b>3.29 (3.26 - 3.33)</b> | <b>2.57 (2.54, 2.60)</b> | <b>4.5 (4.42, 4.59)</b>  | <b>4.41 (4.36, 4.46)</b> | <b>3.40 (3.36, 3.43)</b> | <b>2.75 (2.73, 2.78)</b> |
| <b>C4-C7</b> | 2.18 (2.16, 2.20)         | 1.53 (1.51, 1.54)        | 1.26 (1.24, 1.28)        | 1.85 (1.83, 1.87)        | 2.42 (2.39, 2.44)         | 1.40 (1.38, 1.41)        | 1.89 (1.85, 1.94)        | 1.80 (1.77, 1.82)        | 1.97 (1.95, 1.99)        | <b>1.89 (1.88, 1.91)</b> |
| <b>DC</b>    | <b>2.33 (2.29 , 2.36)</b> | <b>1.40 (1.38, 1.43)</b> | <b>2.11 (2.07, 2.16)</b> | <b>3.06 (3.01, 3.11)</b> | <b>2.99 (2.95, 3.03)</b>  | <b>2.06 (2.02, 2.09)</b> | 1.27 (1.22, 1.31)        | <b>3.19 (3.13, 3.25)</b> | <b>2.83 (2.79, 2.87)</b> | <b>2.42 (2.39, 2.46)</b> |
| <b>LF</b>    | 1.60 (1.58, 1.62)         | 1.31 (1.30, 1.33)        | 1.05 (1.03, 1.08)        | 1.52 (1.50, 1.54)        | 1.87 (1.85, 1.89)         | 1.33 (1.31, 1.34)        | <b>2.43 (2.37, 2.48)</b> | 2.02 (1.99, 2.04)        | 1.80 (1.78, 1.83)        | <b>1.57 (1.55, 1.59)</b> |
| <b>VF</b>    | 0.46 (0.45, 0.47)         | 0.19 (0.18, 0.20)        | 0.27 (0.26, 0.29)        | 0.44 (0.43, 0.45)        | 0.44 (0.43, 0.45)         | 0.24 (0.23, 0.25)        | 1.05 (0.99, 1.10)        | 0.44 (0.42, 0.45)        | 0.34 (0.33, 0.35)        | <b>0.37 (0.36, 0.38)</b> |

Lesion frequency (%) averaged value (confidence interval at 95%) in multiple regions of interest of the cervical spinal cord, for different populations. EDSS and disease duration (DD) were only available for 549 individuals. For a given population (i.e. each column), values in violet indicate higher median values comparing (i) C1-C3 vs. C4-C7, (ii) DC vs. LF vs. VF. EDSS scores categories: mild (0-2.5), moderate (3-5.5) and severe ( $\geq 6$ ), and DD categories: short (0-5 years) moderate (5-15 years), long ( $\geq 15$  years). No statistical tests were performed for lesion frequency between regions of interests. Abbreviations: DC, dorsal columns; LF, lateral funiculi; VF, ventral funiculi.

**Table A4.** Significant phenotypic differences in cervical cord lesion distributions, and significant correlation between lesion distribution and an increase of EDSS.

| Analysis                                                                                                                                                                                                                                                                                                                                                                                                                                                                                                                                                                                                                                                                                                                         | Vertebral level | Region of interest | t-value at local maxima | P-value, FWE corrected |
|----------------------------------------------------------------------------------------------------------------------------------------------------------------------------------------------------------------------------------------------------------------------------------------------------------------------------------------------------------------------------------------------------------------------------------------------------------------------------------------------------------------------------------------------------------------------------------------------------------------------------------------------------------------------------------------------------------------------------------|-----------------|--------------------|-------------------------|------------------------|
| Differences between RRMS versus SPMS patients                                                                                                                                                                                                                                                                                                                                                                                                                                                                                                                                                                                                                                                                                    |                 |                    |                         |                        |
|                                                                                                                                                                                                                                                                                                                                                                                                                                                                                                                                                                                                                                                                                                                                  | C3              | LF                 | 4.5                     | 0.031                  |
| Differences between RRMS versus PPMS patients                                                                                                                                                                                                                                                                                                                                                                                                                                                                                                                                                                                                                                                                                    |                 |                    |                         |                        |
|                                                                                                                                                                                                                                                                                                                                                                                                                                                                                                                                                                                                                                                                                                                                  | C3              | LF                 | 5.0                     | 0.011                  |
|                                                                                                                                                                                                                                                                                                                                                                                                                                                                                                                                                                                                                                                                                                                                  | C3              | Central cord area  | 4.3                     | 0.020                  |
| Differences between SPMS versus PPMS patients                                                                                                                                                                                                                                                                                                                                                                                                                                                                                                                                                                                                                                                                                    |                 |                    |                         |                        |
|                                                                                                                                                                                                                                                                                                                                                                                                                                                                                                                                                                                                                                                                                                                                  | None            | None               | None                    | Not significant        |
| Correlation with an increase of EDSS                                                                                                                                                                                                                                                                                                                                                                                                                                                                                                                                                                                                                                                                                             |                 |                    |                         |                        |
|                                                                                                                                                                                                                                                                                                                                                                                                                                                                                                                                                                                                                                                                                                                                  | C1              | LF                 | 5.2                     | < 0.001                |
|                                                                                                                                                                                                                                                                                                                                                                                                                                                                                                                                                                                                                                                                                                                                  | C1              | Central cord area  | 5.2                     | < 0.001                |
|                                                                                                                                                                                                                                                                                                                                                                                                                                                                                                                                                                                                                                                                                                                                  | C2              | LF                 | 5.4                     | < 0.001                |
|                                                                                                                                                                                                                                                                                                                                                                                                                                                                                                                                                                                                                                                                                                                                  | C2              | Central cord area  | 5.2                     | < 0.001                |
|                                                                                                                                                                                                                                                                                                                                                                                                                                                                                                                                                                                                                                                                                                                                  | C3              | LF                 | 5.0                     | < 0.001                |
|                                                                                                                                                                                                                                                                                                                                                                                                                                                                                                                                                                                                                                                                                                                                  | C3              | Central cord area  | 5.5                     | < 0.001                |
|                                                                                                                                                                                                                                                                                                                                                                                                                                                                                                                                                                                                                                                                                                                                  | C4              | LF                 | 4.3                     | < 0.001                |
|                                                                                                                                                                                                                                                                                                                                                                                                                                                                                                                                                                                                                                                                                                                                  | C5              | LF                 | 3.7                     | 0.003                  |
| <p>The peak t-value of each significant voxels cluster (<math>p &lt; 0.05</math>, FWE corrected) is indicated as well as its location in terms of vertebral level and cross-sectional region of interest. Group comparisons analysed cord locations where the lesion frequencies were lower in one group versus another: RRMS versus SPMS, RRMS versus PPMS, and SPMS versus PPMS. Group comparisons were adjusted for age, while correlation with EDSS was corrected for age and disease duration. Abbreviations: EDSS, Expanded Disability Status Scale; FWE, family-wise error; MS, multiple sclerosis; RRMS, relapsing-remitting MS; PPMS, primary progressive MS; SPMS, secondary progressive MS; LF, lateral funiculi.</p> |                 |                    |                         |                        |

**Table A5.** Lesion volumes in grey and white matter for different phenotype populations.

|                                                                                                                                                                                                                                                                                                                                                                                                                                                                                                                                                                                                                                                                                                                 |           | Phenotype     |                    |                    |                   |                   | Total cohort<br>n=231 |
|-----------------------------------------------------------------------------------------------------------------------------------------------------------------------------------------------------------------------------------------------------------------------------------------------------------------------------------------------------------------------------------------------------------------------------------------------------------------------------------------------------------------------------------------------------------------------------------------------------------------------------------------------------------------------------------------------------------------|-----------|---------------|--------------------|--------------------|-------------------|-------------------|-----------------------|
|                                                                                                                                                                                                                                                                                                                                                                                                                                                                                                                                                                                                                                                                                                                 |           |               | <b>CIS</b><br>n=21 | <b>RR</b><br>n=154 | <b>SP</b><br>n=29 | <b>PP</b><br>n=23 |                       |
| <b>Absolute Lesion Volume, mm<sup>3</sup></b>                                                                                                                                                                                                                                                                                                                                                                                                                                                                                                                                                                                                                                                                   | <b>GM</b> | <i>Mean</i>   | 8.41               | 38.36              | 37.20             | 41.19             | <b>35.49</b>          |
|                                                                                                                                                                                                                                                                                                                                                                                                                                                                                                                                                                                                                                                                                                                 |           | <i>SD</i>     | 13.78              | 70.90              | 41.75             | 57.88             | <b>63.43</b>          |
|                                                                                                                                                                                                                                                                                                                                                                                                                                                                                                                                                                                                                                                                                                                 |           | <i>Median</i> | 2.15               | 9.83               | 18.28             | 19.38             | <b>11.09</b>          |
|                                                                                                                                                                                                                                                                                                                                                                                                                                                                                                                                                                                                                                                                                                                 |           | <i>IQR</i>    | 10.54              | 44.35              | 40.34             | 38.98             | <b>41.10</b>          |
|                                                                                                                                                                                                                                                                                                                                                                                                                                                                                                                                                                                                                                                                                                                 | <b>WM</b> | <i>Mean</i>   | <b>50.30</b>       | <b>110.19</b>      | <b>135.40</b>     | <b>143.02</b>     | <b>110.52</b>         |
|                                                                                                                                                                                                                                                                                                                                                                                                                                                                                                                                                                                                                                                                                                                 |           | <i>SD</i>     | 53.87              | 148.67             | 127.78            | 133.41            | <b>139.48</b>         |
|                                                                                                                                                                                                                                                                                                                                                                                                                                                                                                                                                                                                                                                                                                                 |           | <i>Median</i> | <b>42.38</b>       | <b>54.37</b>       | <b>85.52</b>      | <b>89.61</b>      | <b>62.01</b>          |
|                                                                                                                                                                                                                                                                                                                                                                                                                                                                                                                                                                                                                                                                                                                 |           | <i>IQR</i>    | 65.57              | 118.34             | 94.84             | 117.49            | <b>116.89</b>         |
| <b>Normalised Lesion Volume</b>                                                                                                                                                                                                                                                                                                                                                                                                                                                                                                                                                                                                                                                                                 | <b>GM</b> | <i>Mean</i>   | 0.006              | <b>0.026</b>       | <b>0.025</b>      | <b>0.028</b>      | <b>0.024</b>          |
|                                                                                                                                                                                                                                                                                                                                                                                                                                                                                                                                                                                                                                                                                                                 |           | <i>SD</i>     | 0.009              | 0.048              | 0.028             | 0.039             | <b>0.043</b>          |
|                                                                                                                                                                                                                                                                                                                                                                                                                                                                                                                                                                                                                                                                                                                 |           | <i>Median</i> | 0.001              | 0.007              | 0.012             | 0.013             | <b>0.008</b>          |
|                                                                                                                                                                                                                                                                                                                                                                                                                                                                                                                                                                                                                                                                                                                 |           | <i>IQR</i>    | 0.007              | 0.030              | 0.027             | 0.026             | <b>0.028</b>          |
|                                                                                                                                                                                                                                                                                                                                                                                                                                                                                                                                                                                                                                                                                                                 | <b>WM</b> | <i>Mean</i>   | <b>0.009</b>       | 0.019              | 0.023             | 0.025             | <b>0.019</b>          |
|                                                                                                                                                                                                                                                                                                                                                                                                                                                                                                                                                                                                                                                                                                                 |           | <i>SD</i>     | 0.009              | 0.026              | 0.022             | 0.023             | <b>0.024</b>          |
|                                                                                                                                                                                                                                                                                                                                                                                                                                                                                                                                                                                                                                                                                                                 |           | <i>Median</i> | <b>0.007</b>       | <b>0.009</b>       | <b>0.015</b>      | <b>0.015</b>      | <b>0.011</b>          |
|                                                                                                                                                                                                                                                                                                                                                                                                                                                                                                                                                                                                                                                                                                                 |           | <i>IQR</i>    | 0.011              | 0.020              | 0.016             | 0.020             | <b>0.020</b>          |
| <p>Absolute and normalised lesion volume mean, SD, median, and IQR values in the grey and white matter of the cervical spinal cord, for different phenotype populations. Normalised lesion volumes represent the proportion of a region affected by lesions. For a given population (i.e. each column), coloured values indicate higher mean (violet) and median (red) values comparing GM vs. WM. Abbreviations: MS, multiple sclerosis; CIS, clinically isolated syndrome; RRMS, relapsing-remitting MS; PPMS, primary progressive MS; SPMS, secondary progressive MS; GM, grey matter; WM, white matter; SD, standard deviation; IQR, interquartile range. Phenotype was not available for all subjects.</p> |           |               |                    |                    |                   |                   |                       |

**Table A6.** Lesion volumes in white matter regions for different phenotype populations.

|                                               |           |               | Phenotype    |               |              |              | Total cohort<br>n=642 |
|-----------------------------------------------|-----------|---------------|--------------|---------------|--------------|--------------|-----------------------|
|                                               |           |               | CIS<br>n=31  | RRMS<br>n=416 | SPMS<br>n=84 | PPMS<br>n=73 |                       |
| <b>Absolute Lesion Volume, mm<sup>3</sup></b> | <b>DC</b> | <i>Mean</i>   | 36.42        | <b>65.28</b>  | 65.46        | 68.30        | <b>63.83</b>          |
|                                               |           | <i>SD</i>     | 60.          | 97.52         | 85.62        | 102.63       | <b>94.51</b>          |
|                                               |           | <i>Median</i> | 11.44        | 24.33         | 33.22        | 28.84        | <b>26.48</b>          |
|                                               |           | <i>IQR</i>    | 42.6         | 82.80         | 76.19        | 74.96        | <b>78.99</b>          |
|                                               | <b>LF</b> | <i>Mean</i>   | <b>42.33</b> | 61.63         | <b>69.68</b> | <b>76.28</b> | <b>63.05</b>          |
|                                               |           | <i>SD</i>     | 61.57        | 85.81         | 79.20        | 95.66        | <b>85.36</b>          |
|                                               |           | <i>Median</i> | <b>18.10</b> | <b>27.85</b>  | <b>46.72</b> | <b>45.26</b> | <b>32.79</b>          |
|                                               |           | <i>IQR</i>    | 51.85        | 74.18         | 67.95        | 68.67        | <b>75.29</b>          |
|                                               | <b>VF</b> | <i>Mean</i>   | 3.07         | 8.13          | 7.61         | 6.62         | <b>7.57</b>           |
|                                               |           | <i>SD</i>     | 7.61         | 17.53         | 19.67        | 11.31        | <b>16.96</b>          |
|                                               |           | <i>Median</i> | 0.           | 0.70          | 0.79         | 1.94         | <b>0.56</b>           |
|                                               |           | <i>IQR</i>    | 0.56         | 7.42          | 6.76         | 7.79         | <b>6.70</b>           |
| <b>Normalised Lesion Volume</b>               | <b>DC</b> | <i>Mean</i>   | <b>0.019</b> | <b>0.034</b>  | <b>0.034</b> | <b>0.036</b> | <b>0.034</b>          |
|                                               |           | <i>SD</i>     | 0.032        | 0.051         | 0.045        | 0.054        | <b>0.050</b>          |
|                                               |           | <i>Median</i> | 0.006        | <b>0.013</b>  | <b>0.018</b> | 0.015        | <b>0.014</b>          |
|                                               |           | <i>IQR</i>    | 0.022        | 0.044         | 0.040        | 0.040        | <b>0.042</b>          |
|                                               | <b>LF</b> | <i>Mean</i>   | 0.016        | 0.023         | 0.026        | 0.029        | <b>0.024</b>          |
|                                               |           | <i>SD</i>     | 0.023        | 0.032         | 0.030        | 0.036        | <b>0.032</b>          |
|                                               |           | <i>Median</i> | <b>0.007</b> | 0.010         | <b>0.018</b> | <b>0.017</b> | <b>0.012</b>          |
|                                               |           | <i>IQR</i>    | 0.019        | 0.028         | 0.026        | 0.026        | <b>0.028</b>          |
|                                               | <b>VF</b> | <i>Mean</i>   | 0.003        | 0.007         | 0.006        | 0.005        | <b>0.006</b>          |
|                                               |           | <i>SD</i>     | 0.006        | 0.014         | 0.016        | 0.009        | <b>0.014</b>          |
|                                               |           | <i>Median</i> | 0.           | 0.001         | 0.001        | 0.002        | <b>0.</b>             |
|                                               |           | <i>IQR</i>    | 0.           | 0.006         | 0.006        | 0.006        | <b>0.005</b>          |

Absolute and normalised lesion volume mean, SD, median, and IQR values in multiple regions of interest of the cervical spinal cord (DC, LF, VF), for different phenotype populations. Normalised lesion volumes represent the proportion of a region affected by lesions. For a given population (i.e. each column), coloured values indicate higher mean (violet) and median (red) values comparing DC vs. LF vs. VF. Abbreviations: MS, multiple sclerosis; CIS, clinically isolated syndrome; RRMS, relapsing-remitting MS; PPMS, primary progressive MS; SPMS, secondary progressive MS; DC, dorsal columns; LF, lateral funiculi; VF, ventral funiculi; SD, standard deviation; IQR, interquartile range. Phenotype was not available for all subjects.

**Table A7.** Lesion volumes in motor and sensory tracts for different populations, defined by patient EDSS.

|                                                       |                                         | Mild EDSS           | Moderate EDSS | Severe EDSS  | Total cohort |               |              |
|-------------------------------------------------------|-----------------------------------------|---------------------|---------------|--------------|--------------|---------------|--------------|
|                                                       |                                         | n=230               | n=226         | n=126        | n=642        |               |              |
| <b>Absolute<br/>Lesion<br/>Volume, mm<sup>3</sup></b> | <b>Motor tracts</b>                     | <i>Mean</i>         | 42.99         | 47.58        | 55.60        | <b>47.34</b>  |              |
|                                                       |                                         | <i>SD</i>           | 62.05         | 67.46        | 56.87        | <b>63.21</b>  |              |
|                                                       |                                         | <i>Median</i>       | 19.73         | 24.31        | 39.36        | <b>25.70</b>  |              |
|                                                       |                                         | <i>IQR</i>          | 54.87         | 49.78        | 63.12        | <b>54.24</b>  |              |
|                                                       | <b>Sensory tracts</b>                   | <i>Mean</i>         | <b>75.31</b>  | <b>93.74</b> | <b>98.75</b> | <b>86.10</b>  |              |
|                                                       |                                         | <i>SD</i>           | 104.34        | 127.03       | 117.38       | <b>114.91</b> |              |
|                                                       |                                         | <i>Median</i>       | <b>35.44</b>  | <b>47.67</b> | <b>55.86</b> | <b>43.33</b>  |              |
|                                                       |                                         | <i>IQR</i>          | 85.61         | 110.55       | 97.61        | <b>95.49</b>  |              |
|                                                       | <b>Normalised<br/>Lesion<br/>Volume</b> | <b>Motor tracts</b> | <i>Mean</i>   | 0.017        | 0.018        | 0.022         | <b>0.018</b> |
|                                                       |                                         |                     | <i>SD</i>     | 0.024        | 0.026        | 0.022         | <b>0.025</b> |
|                                                       |                                         |                     | <i>Median</i> | 0.008        | 0.009        | 0.015         | <b>0.010</b> |
|                                                       |                                         |                     | <i>IQR</i>    | 0.021        | 0.019        | 0.024         | <b>0.021</b> |
| <b>Sensory tracts</b>                                 |                                         | <i>Mean</i>         | <b>0.024</b>  | <b>0.030</b> | <b>0.031</b> | <b>0.027</b>  |              |
|                                                       |                                         | <i>SD</i>           | 0.033         | 0.040        | 0.037        | <b>0.036</b>  |              |
|                                                       |                                         | <i>Median</i>       | <b>0.011</b>  | <b>0.015</b> | <b>0.018</b> | <b>0.014</b>  |              |
|                                                       |                                         | <i>IQR</i>          | 0.027         | 0.035        | 0.031        | <b>0.030</b>  |              |

Absolute and normalised lesion volume mean, SD, median, and IQR values in motor and sensory tracts of the cervical spinal cord, for different populations defined by patient EDSS. Normalised lesion volumes represent the proportion of a region affected by lesions. For a given population (i.e. each column), coloured values indicate higher mean (violet) and median (red) values comparing motor vs. sensory tracts. EDSS score categories: mild (0-2.5), moderate (3-5.5) and severe ( $\geq 6$ ). Abbreviations: EDSS, Expanded Disability Status Scale; IQR, interquartile range; SD, standard deviation. EDSS score was not available for all subjects.



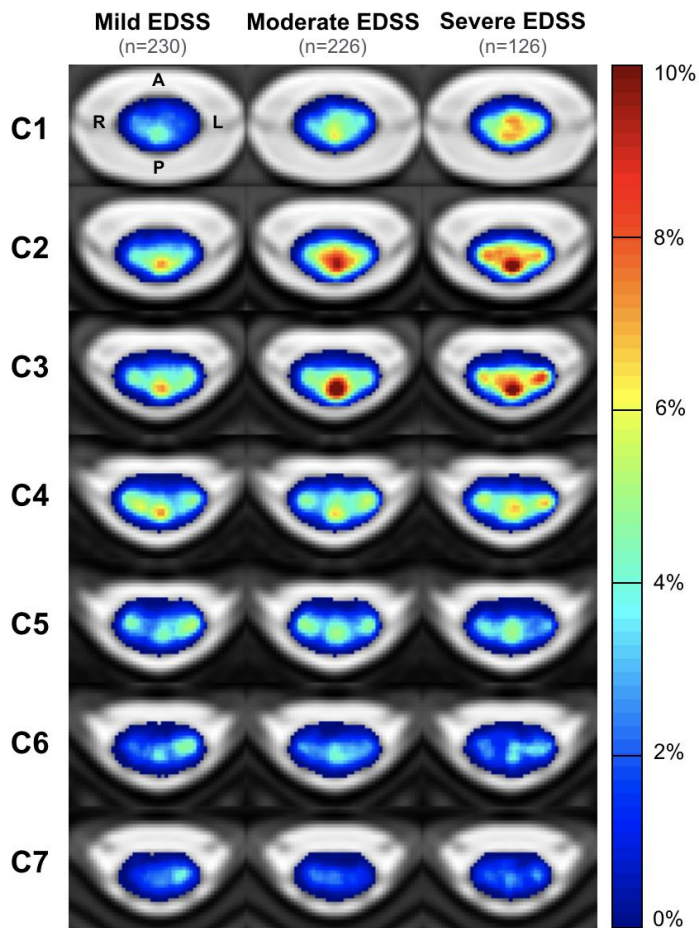

**Figure A1. Frequency of MS lesions the cervical spinal cord for patients grouped by EDSS score categories.** EDSS score categories: mild (0-2.5), moderate (3-5.5) and severe ( $\geq 6$ ). EDSS, Expanded Disability Status Scale. A: anterior; P: posterior; L: left; R: right.
